# Supplementary material for: The Genus Cynometra: A Review of Ethnomedicine, Chemical, and Biological Data
Source: MDPI journal article supplement (doi:10.3390/plants11243504), 2022-12-14
Supplement: s1 [file s1]

**Table S1.** *In vitro* and *in vivo* biological studies reported from the genus *Cynometra*

| Species                  | Part used   | Extract/compound      | Biological activity               | Test/Assay                                                                                                           | Result                                                                                                                                                                                                                                                                                                                                                                                           | Ref. |
|--------------------------|-------------|-----------------------|-----------------------------------|----------------------------------------------------------------------------------------------------------------------|--------------------------------------------------------------------------------------------------------------------------------------------------------------------------------------------------------------------------------------------------------------------------------------------------------------------------------------------------------------------------------------------------|------|
| <i>C. bauhiniifolia</i>  | bark        | dichloromethane       | antibacterial                     | <i>In vitro</i> – radiometric assays                                                                                 | 88 % inhibition of <i>M. tuberculosis</i> at 50 µg/ml                                                                                                                                                                                                                                                                                                                                            | [58] |
| <i>C. brachyrrhachis</i> | root        | methanol              | cytotoxic                         | <i>In vitro</i> - MTS assay                                                                                          | IC <sub>50</sub> values 79.2 ± 0.7 µg/ml                                                                                                                                                                                                                                                                                                                                                         | [17] |
| <i>C. cauliflora</i>     | fruit       | methanol              | antioxidant                       | <i>In vitro</i> - beta-carotene bleaching assay                                                                      | Lowest antioxidant capacity (45.95%)                                                                                                                                                                                                                                                                                                                                                             | [48] |
|                          | fruit       | methanol              | cytotoxic                         | <i>In vitro</i> - MTT, cell proliferation assay                                                                      | CD <sub>50</sub> of the extract was 0.9 µg/mL, whereas of the drug vincristine was 0.2 µg/mL after 72 hours of exposure                                                                                                                                                                                                                                                                          | [59] |
|                          | leaf, fruit | aqueous, methanol     | antioxidant                       | <i>In vitro</i> - FRAP assay and TPC assay                                                                           | Higher TPC (847.31 + 26.82 mg GAE/100g) and FRAP values (19397.22 +1296.29 µM/g) in methanol extract                                                                                                                                                                                                                                                                                             | [60] |
|                          | leaf, fruit | water: methanol (1:3) | anti-lipase                       | <i>In vitro</i>                                                                                                      | Leaf and fruit extract showed 100 % and 97.9% anti-lipase activity, respectively                                                                                                                                                                                                                                                                                                                 | [61] |
|                          | leaf        | methanol              | antibacterial and antioxidant     | <i>In vitro</i>                                                                                                      | The extract was more sensitive to <i>Staphylococcus aureus</i> (23.7±3.3 mm) than to <i>Escherichia coli</i> . In contrast, the extract combination with trigona honey was more sensitive to <i>E. coli</i> (23±1.9 mm) than <i>S. aureus</i> (17.6±2.6 mm). The extract and combination presented high antioxidant potentiality with IC <sub>50</sub> 0.0048±0.000 mg/mL and 0.0085±0.000 mg/mL | [62] |
|                          | leaf        | methanol              | antidiabetic and antidiarrheal    | <i>In vivo</i> - using rabbit                                                                                        | 100 mg/mL, 250 mg/mL, and 300 mg/mL of extracts showed the ability to inhibit α-amylase activity by 20.6 8%, 70.24%, and 72.59%, and IC <sub>50</sub> of 200.67 ± 0.53 mg/mL. Also showed antidiarrheal potentiality                                                                                                                                                                             | [63] |
|                          | leaf        | ethanol               | Anti-inflammatory and antioxidant | <i>In vitro</i> – A5-LOX, hyaluronidase, xanthinoxidase enzyme inhibitory, NO production inhibitory, and DPPH assays | A5-LOX and hyaluronidase, inhibitory activities with IC <sub>50</sub> values of 77.21 ± 3.14 and 25.75 ± 1.24 µg/mL respectively. At 500 g/mL extract inhibited 14.65% NO production<br><br>High xanthine oxidase inhibitory activity with 48.86% inhibition at 250 g/mL and potent antioxidant activity giving IC <sub>50</sub> value 12.46 ± 0.22 µg/mL. Higher TPC and TFC were also recorded | [64] |

| Species | Part used        | Extract/compound                                                          | Biological activity                                                    | Test/Assay                                                           | Result                                                                                                                                                                                                                                                  | Ref. |
|---------|------------------|---------------------------------------------------------------------------|------------------------------------------------------------------------|----------------------------------------------------------------------|---------------------------------------------------------------------------------------------------------------------------------------------------------------------------------------------------------------------------------------------------------|------|
|         | leaf             | methanol and its fractions                                                | $\alpha$ -glucosidase, AChE, and tyrosinase inhibitory and antioxidant | <i>In vitro</i>                                                      | Potent inhibition of all three enzymes and high antioxidant activity at p <0.05                                                                                                                                                                         | [15] |
|         | leaf, stem, bark | aqueous                                                                   | antioxidant                                                            | <i>In vitro</i> – DPPH assay                                         | Antioxidant potentiality in the following order: young leave > matured leave > stem > bark compared with ascorbic acid. The IC <sub>50</sub> % ranged from 66.36 to 258.98%                                                                             | [19] |
|         | leaf             | aqueous                                                                   | antioxidant and antidiabetic                                           | <i>In vivo</i>                                                       | Significantly prevented diabetic complications associated with oxidative stress                                                                                                                                                                         | [65] |
|         | stem             | ethyl acetate                                                             | antioxidant                                                            | <i>In vitro</i> – DPPH assay                                         | High antioxidant activity (IC <sub>50</sub> value 4.68 $\pm$ 0.035 ppm)                                                                                                                                                                                 | [53] |
|         | fruit            | hexane, chloroform, ethyl acetate, ethanol, methanol, and distilled water | antifungal and cytotoxic                                               | <i>In vitro</i>                                                      | chloroform extract (640 $\mu$ g/mL) showed significant toxicity (P>0.001) on the Vero cells; all extracts showed antifungal activity in different fungal species                                                                                        | [66] |
|         | leaf             | methanol                                                                  | antibacterial                                                          | <i>In vitro</i> - Tukey-HSD test                                     | The concentration of 100% showed the highest average inhibition zone (11.43 mm) against <i>Porphyromonas gingivalis</i>                                                                                                                                 | [67] |
|         | leaf             | methanol                                                                  | antibacterial                                                          | <i>In vitro</i> - broth dilution method                              | MIC of the extract ranged between 6.25 and 12.5 mg/ml against both <i>S. aureus</i> and MRSA. MBC values were higher than MIC, indicating that the extract is bacteriostatic at lower concentrations and bactericidal at higher concentrations          | [33] |
|         | leaf, stem       | methanol                                                                  | anti-AChE                                                              | <i>In vitro</i> - colorimetric 96-well microplate-based assay method | Potent anti-cholinesterase activities (> 80% inhibition) at 200 $\mu$ g/ml against both AChE and BchE enzymes                                                                                                                                           | [68] |
|         | leaf             | ethanol, vitexin                                                          | anti-obesity and lipid-lowering effects                                | <i>In vivo</i>                                                       | Extract (400 and 200 mg/kg) and vitexin showed anti-obesity activity. Both doses of the extract also (P $\leq$ 0.05) decreased serum triglyceride, LDL, lipase, IL-6, peptide YY, resistin levels, hyperglycemia, hyperinsulinemia, and hyperleptinemia | [69] |

| Species | Part used         | Extract/ compound                               | Biological activity                              | Test/Assay                                                                                               | Result                                                                                                                                                                                                                                                                                                                                                                                                                                                                                                                                                                                 | Ref. |
|---------|-------------------|-------------------------------------------------|--------------------------------------------------|----------------------------------------------------------------------------------------------------------|----------------------------------------------------------------------------------------------------------------------------------------------------------------------------------------------------------------------------------------------------------------------------------------------------------------------------------------------------------------------------------------------------------------------------------------------------------------------------------------------------------------------------------------------------------------------------------------|------|
|         | fruit             | aqueous                                         | antioxidant                                      | <i>In vitro</i> – DPPH, FRAP, and TBA (thiobarbituric acid) assays                                       | Potential antioxidant activity and gave value $328.0 \pm 9.0$ $\mu\text{g/mL}$ $\text{IC}_{50}$ , $24.4 \pm 2.05$ $\mu\text{M}$ , and $42.0 \pm 0.6$ AAE/gDW for DPPH, FRAP, TBA assays                                                                                                                                                                                                                                                                                                                                                                                                | [49] |
|         | leaf              | ethanol                                         | antioxidant and $\alpha$ -Glucosidase            | <i>In vitro</i> -DPPH free radical scavenging, NO scavenging, and $\alpha$ -glucosidase assays           | Stronger antioxidant capability ( $\text{IC}_{50}$ value $2.88 \pm 0.05$ $\mu\text{g/mL}$ than the standard quercetin. High inhibitory $\alpha$ -glucosidase activity ( $\text{IC}_{50}$ value $0.90 \pm 0.02$ )                                                                                                                                                                                                                                                                                                                                                                       | [46] |
|         | fruit             | ethanol                                         | antioxidant and $\alpha$ -glucosidase inhibitory | <i>In vitro</i> - DPPH free radical scavenging assay, $\alpha$ -Glucosidase inhibitory activity assay    | The extract exhibited DPPH radical scavenging activity with $\text{IC}_{50}$ value of $11.33 \pm 0.15$ $\mu\text{g/mL}$ and $\alpha$ -Glucosidase inhibitory activity with $\text{IC}_{50}$ value of $3.01 \pm 0.19$ $\mu\text{g/mL}$                                                                                                                                                                                                                                                                                                                                                  | [47] |
|         | fruit             | methanol                                        | antibacterial                                    | <i>In vitro</i> - microdilution assay                                                                    | No activity against Bacterial strains [MSSA (ATCC 12600 and MRSA strains (NCTC 12493 and ATCC 43300)]                                                                                                                                                                                                                                                                                                                                                                                                                                                                                  | [70] |
|         | leaf              | methanol                                        | cytotoxic activity and anti-viral                | <i>In vitro</i> - MTT assay; Plaque reduction assays                                                     | Cytotoxic concentration, $\text{CC}_{50}$ of the extract was 36 mg/ mL. Potential antiviral activity against HSV-1 with effective concentration, $\text{EC}_{50} = 2.14$ mg/ mL and with selective index, SI value of 16.8                                                                                                                                                                                                                                                                                                                                                             | [71] |
|         | leaf              | methanol                                        | cytotoxic                                        | <i>In vitro</i> - BSLT                                                                                   | $\text{LC}_{50}$ value for the extract was 196.12 ppm, and the combination of the extract with Trigona honey showed 36.6% cytotoxic activity with $\text{LC}_{50}$ 168.2 ppm                                                                                                                                                                                                                                                                                                                                                                                                           | [72] |
|         | leaf, twig, fruit | The essential oil obtained by hydrodistillation | antioxidant, antibacterial, and cytotoxic        | <i>In vitro</i> - DPPH free radical scavenging assay, Kirby Bauer assay, Broth dilution assay, MTT assay | Twig oil ( $\text{IC}_{50}$ $37.12 \pm 2.84$ mg/mL) exhibited better antioxidant power than the leaf ( $\text{IC}_{50}$ $207.17 \pm 2.95$ mg/mL) and fruit oils ( $\text{IC}_{50}$ $461.88 \pm 12.61$ mg/mL)<br><br>Twig oil showed activity against all microorganisms tested with inhibition zones ranging from $10.3 \pm 0.4$ to $29.7 \pm 0.4$ mm. Fruit oil exhibited antibacterial effects on <i>S. aureus</i> and MRSA, with inhibition zones of 12.7 and 11.7 mm, respectively. Twig oil decreases the proliferation of human breast cancer MCF-7 cells to 50% ( $p < 0.001$ ) | [40] |
|         | leaf              | aqueous                                         | antidiabetic                                     | <i>In vivo</i> - using rat                                                                               | Significant reduction in blood sugar levels at a dose of 2.500 mg per day                                                                                                                                                                                                                                                                                                                                                                                                                                                                                                              | [73] |

| Species                    | Part used        | Extract/ compound                                                          | Biological activity | Test/Assay                                   | Result                                                                                                                                                                                                                 | Ref. |
|----------------------------|------------------|----------------------------------------------------------------------------|---------------------|----------------------------------------------|------------------------------------------------------------------------------------------------------------------------------------------------------------------------------------------------------------------------|------|
|                            | fruit            | aqueous                                                                    | antioxidant         | <i>In vitro</i> - DPPH and FRAP assay        | Potential antioxidant activity giving IC <sub>50</sub> value 0.47 ± 0.03 g of dry weight /mL and reducing power 25.07 ± 0.73 µmol FSE/g dry weight for DPPH and FRAP assays, respectively                              | [50] |
|                            | seedless fruit   | methanol                                                                   | antioxidant         | <i>In vitro</i> - DPPH and FRAP assay        | Very high antioxidant potentiality giving IC <sub>50</sub> value 8.7± 0.3 in DPPH assay whereas giving low potentiality in FRAP assay by giving the value of 63.2±2.9                                                  | [51] |
|                            | leaf             | ethanol                                                                    | cytotoxic           | <i>In vitro</i> - BSLT and MTT assay         | The extract showed moderate cytotoxic activity with an LC <sub>50</sub> value of 125.89 µg/mL, and a concentration of 25 µg/mL of extract inhibited the proliferation of HeLa cancer cells by 57.51%                   | [74] |
| <i>C. cloiselii</i>        | aerial part      | ethanol                                                                    | antiviral           | <i>In vitro</i>                              | Significant activity against HSV at concentrations of less than 25 µg/ml. Also showed anti- SINV activity, which was not much impressive                                                                               | [75] |
| <i>C. iripa</i>            | leaf             | methanol, ethyl acetate, chloroform, chloroform: methanol (1:1) and hexane | antibacterial       | <i>In vitro</i> - disc-assay method          | Methanol, ethyl acetate, and chloroform: methanol extracts showed antibacterial activity against all tested pathogens. Chloroform extract exhibits activity against all pathogens except <i>Pseudomonas aeruginosa</i> | [76] |
|                            | leaf, stem, seed | ethanol, methanol                                                          | antibacterial       | <i>In vitro</i> - cup plate diffusion method | Methanolic extracts showed high antibacterial activity against <i>Pseudomonas aeruginosa</i> as compared to ethanolic                                                                                                  | [77] |
|                            | bark             | methanol                                                                   | antifungal          | <i>In vitro</i> - Food poisoning method      | 33.70 % and 47.74% inhibition against <i>Alternaria alternata</i> and <i>Fusarium moniliforme</i> , respectively                                                                                                       | [78] |
| <i>C. madagascariensis</i> | leaf             | ethanol                                                                    | antiviral           | <i>In vitro</i>                              | Significant activity against HSV at concentrations of less than 25 µg/ml. Anti- SINV activity was not impressive                                                                                                       | [75] |

| Species             | Part used              | Extract/ compound                          | Biological activity                                          | Test/Assay                                                                                        | Result                                                                                                                                                                                                                                                                                                                                 | Ref. |
|---------------------|------------------------|--------------------------------------------|--------------------------------------------------------------|---------------------------------------------------------------------------------------------------|----------------------------------------------------------------------------------------------------------------------------------------------------------------------------------------------------------------------------------------------------------------------------------------------------------------------------------------|------|
| <i>C. ramiflora</i> | seed                   | ethyl acetate fraction of methanol extract | antioxidant, anti-lipid peroxidation, Cancer chemopreventive | <i>In vitro</i> - DPPH assay, thiobarbituric acid method, and quinone reductase induction method. | Strong antioxidant activity with EC <sub>50</sub> value 3.33 µg/ml and strong anti-lipid peroxidation with IC <sub>50</sub> value 0.8992 µg/ml. The extract did not possess cancer chemoprevention activities                                                                                                                          | [79] |
|                     | leaf                   | methanol                                   | antihyperglycemic                                            | <i>In vivo</i>                                                                                    | Significant antihyperglycemic activity and improvement of around 21.6% in glucose tolerance of sucrose-loaded rats                                                                                                                                                                                                                     | [80] |
|                     | bark                   | methanol                                   | cytotoxic                                                    | <i>In vitro</i> - MTT assay                                                                       | Low toxicity (IC <sub>50</sub> >2.5 mg mL <sup>-1</sup> ) against mouse fibroblasts                                                                                                                                                                                                                                                    | [81] |
|                     | leaf                   | ethanol                                    | antiproliferative                                            | <i>In vitro</i> – MTT assay                                                                       | Extract weakly inhibited the MCF-7 cell proliferation with an IC <sub>50</sub> value of 317 µg/ml                                                                                                                                                                                                                                      | [82] |
|                     | leaf                   | methanol                                   | anti-ulcer                                                   | <i>In-vivo</i> - HCl/ethanol-induced ulcer assay                                                  | Low inhibitory activity (13.9 % inhibition)                                                                                                                                                                                                                                                                                            | [35] |
|                     | bark                   | methanol                                   | antibacterial                                                | <i>In vitro</i> - Disk diffusion method                                                           | Significant antibacterial activity against <i>Vibrio cholerae</i> , <i>Salmonella typhi</i> , and <i>Staphylococcus aureus</i> ; moderate activity against <i>Escherichia coli</i> , <i>Shigella dysenteriae</i> , <i>S. sonnei</i> , <i>Shigella boydii</i> , <i>Shigella flexneri</i> , Enterococci, <i>Staphylococcus epidermis</i> | [83] |
|                     |                        |                                            | antinociceptive                                              | <i>In vivo</i> - acetic acid-induced writhing method using mice                                   | Significant writhing inhibition (48.62% inhibition at the dose of 250mg/kg body weight and 63.89% inhibition at the dose of 500 mg/kg body weight)                                                                                                                                                                                     |      |
|                     | stem-bark              | ethanol                                    | antibacterial                                                | <i>In vitro</i> - solid dilution method using Mueller Hinton media                                | Potential antibacterial activity with an MBC value of 2% against <i>Staphylococcus aureus</i> , <i>Pseudomonas aeruginosa</i> , and <i>Shigella sonnei</i>                                                                                                                                                                             | [84] |
|                     | leaf                   | ethanol                                    | cytotoxic                                                    | <i>In vitro</i> - MTT assay                                                                       | Cytotoxic effect to HeLa, T47D, and WiDr cell lines with the IC <sub>50</sub> of 163.37, 533.33, and 69.66 ppm, respectively                                                                                                                                                                                                           | [85] |
|                     | leaf, fruit, stem bark | methanol and its fractions                 | antioxidant                                                  | <i>In vitro</i> – DPPH assay                                                                      | Methanolic extract, the semipolar fraction of leaf extracts, and the fraction of stem bark extract showed a potent antioxidant activity, in that order 54.44, 91.20, 79.64, and 79.59 ppm. The stem bark extract showed the highest activity (IC <sub>50</sub> 41.90 ppm)                                                              | [86] |

| Species | Part used       | Extract/ compound                                            | Biological activity                       | Test/Assay                                                                     | Result                                                                                                                                                                                                                                                                                                                                                                                                                                                                | Ref. |
|---------|-----------------|--------------------------------------------------------------|-------------------------------------------|--------------------------------------------------------------------------------|-----------------------------------------------------------------------------------------------------------------------------------------------------------------------------------------------------------------------------------------------------------------------------------------------------------------------------------------------------------------------------------------------------------------------------------------------------------------------|------|
|         | leaf, stem bark | ethanol                                                      | cytotoxic                                 | <i>In vitro</i> - MTT assay                                                    | Stem bark extract showed the cytotoxic effect on HeLa, T47D, and WiDr cell lines with IC <sub>50</sub> values of >1000, 0.90, and 6.29 µg/mL respectively. Leaf extract exhibits a cytotoxic effect on HeLa, T47D, and WiDr cell lines with IC <sub>50</sub> values of 1,92, 6.37, and 0,41 µg/mL respectively                                                                                                                                                        | [87] |
|         | leaf            | fractions of ethanol extracts                                | cytotoxic                                 | <i>In vitro</i> - MTT assay                                                    | The highest cytotoxic activity was showed by a polar fraction with IC <sub>50</sub> of 260.0171 g/mL, IC <sub>50</sub> non-polar fraction of 294.7592 g/mL, and the lowest activity by the semipolar fraction with IC <sub>50</sub> 318.6368 mg/mL against T47D cells                                                                                                                                                                                                 | [34] |
|         | leaf            | 80% methanol                                                 | antioxidant                               | <i>In vitro</i> – DPPH assay                                                   | Low antioxidant activity with EC <sub>50</sub> value 250.00 µg/ml                                                                                                                                                                                                                                                                                                                                                                                                     | [88] |
|         | leaf, stem      | methanol, chloroform                                         | antioxidant, antimicrobial, and cytotoxic | <i>In vitro</i> - DPPH, disc diffusion method, brine shrimp lethality bioassay | Stem methanolic extract showed the highest antioxidant activity (IC <sub>50</sub> 31.62 µg/mL <sup>-1</sup> ). The chloroform extract of the stem exhibited moderate antimicrobial activity against several bacterial strains (MIC values 62.5 to 500µg.mL <sup>-1</sup> ). The methanolic stem and leaf extracts demonstrated strong lethality in preliminary cytotoxicity assay where LC <sub>50</sub> values were 1.596 and 4.613 µg/mL <sup>-1</sup> respectively | [52] |
|         | leaf            | ethanol                                                      | anti-bacterial                            | <i>In vitro</i> – microdilution technique and a disc diffusion method          | Less antimicrobial potentiality against <i>Escherichia coli</i> and <i>Bacillus subtilis</i> (MIC value 250 and 125 µg/ml, respectively)                                                                                                                                                                                                                                                                                                                              | [89] |
|         | leaf            | not indicated                                                | antiviral                                 | <i>In vitro</i> - on Huh7it-1 cell- Focus assay, MTT assay                     | The CC <sub>50</sub> value and IC <sub>50</sub> values were 125/mL and 20.1/mL, respectively, for the dengue virus                                                                                                                                                                                                                                                                                                                                                    | [90] |
|         | leaf            | FesO <sub>4</sub> . 7h <sub>2</sub> O: aqueous extract (1:2) | antibacterial                             | <i>In vitro</i> - Kirby-Bauer diffusion assay                                  | The synthesized iron oxide nanoparticles exhibited effective inhibition against <i>Escherichia coli</i> and <i>Staphylococcus epidermis</i>                                                                                                                                                                                                                                                                                                                           | [91] |
|         | leaf            | not indicated                                                | antiviral                                 | <i>In vitro</i> -on Huh 7.5 cell -foci-forming immunoassay                     | Potentiality as anti-dengue. Administration of extract at 1,25; 2,5 ;5; 10 and 20 µg/ml resulting 36,06 %, 45,96 %, 47,35%, 55,94%, 62,70% inhibition towards Dengue virus respectively                                                                                                                                                                                                                                                                               | [92] |

| Species                | Part used   | Extract/compound                | Biological activity               | Test/Assay                                                                                                                                                                             | Result                                                                                                                                                                                                                                                              | Ref. |
|------------------------|-------------|---------------------------------|-----------------------------------|----------------------------------------------------------------------------------------------------------------------------------------------------------------------------------------|---------------------------------------------------------------------------------------------------------------------------------------------------------------------------------------------------------------------------------------------------------------------|------|
|                        | leaf        | methanol                        | xanthine oxidase inhibitor        | <i>In vitro</i>                                                                                                                                                                        | The extract inhibited the action of xanthine oxidase                                                                                                                                                                                                                | [93] |
| <i>C. spruceana</i>    | aerial part | methanol: dichloromethane (1:1) | cytotoxic                         | <i>In vitro</i> - cell culture sulforhodamine B method                                                                                                                                 | Active against human adenocarcinoma colon cancer cell line KM-12. (Lethality 18.08%)                                                                                                                                                                                | [94] |
|                        | aerial part | methanol: dichloromethane (1:1) | cytotoxic                         | <i>In vitro</i> - cell culture sulforhodamine B method                                                                                                                                 | The extract showed less activity against the KB-ADL#12 cell line                                                                                                                                                                                                    | [95] |
| <i>C. travancorica</i> | leaf        | methanol                        | antioxidant and anti-inflammatory | <i>In vitro</i> and <i>in vivo</i> -superoxide scavenging, hydroxyl radical scavenging, and inhibition of lipid peroxidation assays, carrageenan, and formalin-induced paw edema assay | Significant antioxidant activity. Oral administration of extract significantly and dose-dependently reduced the paw edema                                                                                                                                           | [96] |
|                        | bark        | methanol                        | antioxidant                       | <i>In vivo</i> - using Swiss albino mice                                                                                                                                               | Catalase activity was found to be significantly increased in mice treated with 200 and 400 mg/Kg while the percentage increase of catalase activity was 15.92 and 49.19% ( $P < 0.001$ ) and the percentage increase of glutathione was found to be 9.75 and 56.36% | [97] |
|                        | stem bark   | methanol                        | antioxidant                       | <i>In vitro</i> - DPPH, superoxide radical scavenging<br><i>In vivo</i> -NaF induced oxidative stress using mice                                                                       | The extract increased catalase (46.6%), superoxide dismutase (53.8%) activities, and GSH level (48.1%) against NaF-induced decline in the liver tissue of mice                                                                                                      | [98] |
| <i>C. vogelii</i>      | leaf        | essential oil                   | antifungal                        | <i>In vitro</i>                                                                                                                                                                        | Significant antifungal activity against <i>Cryptococcus neoformans</i> (MIC = 80 µg/mL) but no antifungal activity against <i>Aspergillus niger</i> or <i>Candida albicans</i>                                                                                      | [57] |

TFC- total flavonoid content; TPC- total phenolic content, DPPH- 2,2-diphenyl-1-picrylhydrazyl; FRAP- ferric reducing antioxidant power; NO- nitric oxide; NaF- Sodium fluoride; SINV- sindbis virus; HSV- herpes simplex virus; LC<sub>50</sub>- lethal concentration 50%, A5- LOX-Arachidonate-5-lipoxygenase; IC<sub>50</sub>- half-maximal inhibitory concentration; EC<sub>50</sub>-half maximal effective concentration; CD<sub>50</sub>- half maximal cytotoxic dose; CC<sub>50</sub>- half maximal cytotoxic concentration; FSE- ferrous sulphate equivalents; BSLT- brine shrimp lethality test; MTT- microculture tetrazolium technique; MIC -minimum inhibitory concentrations; MBC-minimum bactericidal concentrations; MSSA- methicillin-sensitive *Staphylococcus aureus*; MRSA - Methicillin-resistant *Staphylococcus aureus*; GAE- gallic acid equivalent; TBA- thiobarbituric acid, BChE- butyrylcholinesterase; AChE- acetylcholinesterase
